# Supplementary material for: H3PO4/metal halide induces a one-pot solvent-free esterification–halogenation of glycerol and diols
Source: Royal Society of Chemistry journal article supplement (doi:10.1039/c3ra41715h), 2013-01-01
Supplement: c3ra41715h.pdf [file c3ra41715h.pdf]

# H<sub>3</sub>PO<sub>4</sub>/metal halide induces an one pot solvent-free esterification-halogenation of glycerol and diols

Marc Escribà, Jordi Eras, Mercè Balcells and Ramon Canela-Garayoa

## Supporting information

### NMR spectra of the synthesised compounds

**1,3-Dichloro-2-propyl hexadecanoate [CAS: 72165-62-9]:** <sup>1</sup>H NMR (CDCl<sub>3</sub>) δ: 5.18 (quin, *J*=5.2 Hz, 1H, O-CH), 3.73 (m, 4H, 2 CH<sub>2</sub>-Cl), 2.37 (t, *J*=7 Hz, 2H, CH<sub>2</sub>(α) (C=O)), 1.65 (m, 2H, CH<sub>2</sub>(β) (C=O)), 1.26 (m, 24H, CH<sub>2</sub>), 0.88 (t, *J*=7 Hz, 3H, CH<sub>3</sub>). <sup>13</sup>C-RMN (CDCl<sub>3</sub>), δ: 172.7 (C=O), 71.5 (O-CH), 42.5 (CH<sub>2</sub>-Cl), 34.1 (CH<sub>2</sub>(α) (C=O)), 31.9 (CH<sub>2</sub>-CH<sub>2</sub>-CH<sub>3</sub>), 29.7, 29.6, 29.5, 29.4, 29.3, 29.2, 29.0 (CH<sub>2</sub>), 24.8 (CH<sub>2</sub>(β) (C=O)), 22.7 (CH<sub>2</sub>-CH<sub>3</sub>), 14.1 (CH<sub>3</sub>).

**1,3-Dibromo-2-propyl hexadecanoate (A) [CAS: 7739-59-5] and 2,3-dibromo-1-propyl hexadecanoate (B) [CAS: 858835-01-5]:** *A Regioisomer:* <sup>1</sup>H NMR (CDCl<sub>3</sub>) δ: 5.12 (quin, *J*=5.3 Hz, 1H, O-CH), 3.57 (d, *J*=5.3 Hz, 4H, CH<sub>2</sub>-Br), 2.37 (t, 2H, CH<sub>2</sub>(α) (C=O)), 1.65 (m, 2H, CH<sub>2</sub>(β) (C=O)), 1.26 (m, 24H, CH<sub>2</sub>), 0.88 (t, *J*=7 Hz, 3H, CH<sub>3</sub>). <sup>13</sup>C-RMN (CDCl<sub>3</sub>), δ: 172.3 (C=O), 70.9 (O-CH), 42.5 (CH<sub>2</sub>-Br), 34.1 (CH<sub>2</sub>(α) (C=O)), 32.0 (CH<sub>2</sub>-CH<sub>2</sub>-CH<sub>3</sub>), 29.7, 29.6, 29.5, 29.4, 29.3, 29.2, 29.0 (CH<sub>2</sub>), 24.5 (CH<sub>2</sub>(β) (C=O)), 22.1 (CH<sub>2</sub>-CH<sub>3</sub>), 14.0 (CH<sub>3</sub>). *B Regioisomer:* <sup>1</sup>H NMR (CDCl<sub>3</sub>) δ: 4.45 (m, 2H, O-CH<sub>2</sub>), 4.18 (m, 1H, CH-Br), 3.75 (m, 2H, CH<sub>2</sub>-Br). <sup>13</sup>C-RMN (CDCl<sub>3</sub>), δ: 173.0 (C=O), 64.6 (O-CH<sub>2</sub>), 46.9 (CH<sub>2</sub>-CHBr-CH<sub>2</sub>), 32.3 (CHBr-CH<sub>2</sub>Br). All other NMR signals are hidden by the signals of A. m.p.: 31-33°C.

**1,3-Dichloro-2-propyl octanoate [CAS: 88606-77-3]:** <sup>1</sup>H NMR (CDCl<sub>3</sub>), δ: 5.12 (quin, *J*=5.2 Hz, 1H, O-CH), 3.68 (dd, *J*=5.7 Hz, *J*=2.2 Hz, 4H, 2 CH<sub>2</sub>-Cl), 2.31 (t, *J*=7.6 Hz, 2H, CH<sub>2</sub>(α) (C=O)), 1.58 (quin, *J*=7.4 Hz, 2H, CH<sub>2</sub>(β) (C=O)), 1.24 (m, 8H, CH<sub>2</sub>), 0.82 (t, *J*=7.2 Hz, 3H, CH<sub>3</sub>). <sup>13</sup>C RMN (CDCl<sub>3</sub>), δ: 173 (C=O), 72 (O-CH), 42 (CH<sub>2</sub>-Cl), 34.4 (CH<sub>2</sub>(α) (C=O)), 32.1 (CH<sub>2</sub>-CH<sub>2</sub>-CH<sub>3</sub>), 29.5 (CH<sub>2</sub>), 25 (CH<sub>2</sub>(β) (C=O)), 22.5 (CH<sub>2</sub>-CH<sub>3</sub>), 14.5 (CH<sub>3</sub>).

**1,3-Dichloro-2-propyl pivaloate [CAS: 220499-01-4]:** <sup>1</sup>H NMR (CDCl<sub>3</sub>), δ: 5.14 (quin, *J*=5.2 Hz, 1H, O-CH), 3.76 (m, 4H, 2 CH<sub>2</sub>-Cl), 1.24 (m, 9H, CH<sub>3</sub>). <sup>13</sup>C RMN (CDCl<sub>3</sub>), δ: 177.9 (C=O), 71.6 (O-CH), 42.7 (CH<sub>2</sub>-Cl), 39.2 (C-(CH<sub>3</sub>)<sub>3</sub>), 27.3 (3CH<sub>3</sub>).

**2-Chloro-1-ethyl hexadecanoate [CAS: 929-16-8]:** <sup>1</sup>H NMR (CDCl<sub>3</sub>) δ: 0.88 (t, *J*=6.6 Hz, 3 H) 1.20-1.40 (m, 24 H) 1.55-1.60 (m, 2 H) 2.35 (t, *J*=7.4 Hz, 2 H) 3.68 (t, *J*=5.8 Hz, 2 H) 4.33 (t, *J*=5.8 Hz, 2 H). <sup>13</sup>C-RMN (CDCl<sub>3</sub>), δ: 173.5 (C=O), 63.8 (O-CH<sub>2</sub>), 41.6 (CH<sub>2</sub>-Cl), 34.1 (CH<sub>2</sub>(α) (C=O)), 31.9 (CH<sub>2</sub>-CH<sub>2</sub>-CH<sub>3</sub>), 29.7, 29.6, 29.5, 29.4, 29.2, 29.1, 29.0 (CH<sub>2</sub>), 24.9 (CH<sub>2</sub>(β) (C=O)), 22.7 (CH<sub>2</sub>-CH<sub>3</sub>), 14.1 (CH<sub>3</sub>).

**4-Chloro-1-butyl hexadecanoate [CAS: 72165-61-8]:** <sup>1</sup>H NMR (CDCl<sub>3</sub>) δ: 0.88 (t, *J*=6.56 Hz, 3 H) 1.20-1.37 (m, 24 H) 1.57-1.67 (m, 2 H) 1.74-1.91 (m, 4 H) 2.30 (t, *J*=7.5 Hz, 2 H) 3.57 (t, *J*=6.3 Hz, 2 H) 4.11 (t, *J*=6.1 Hz, 2 H). <sup>13</sup>C-RMN (CDCl<sub>3</sub>), δ: 173.8 (C=O), 63.2 (O-CH<sub>2</sub>), 44.4 (CH<sub>2</sub>-Cl), 34.2 (CH<sub>2</sub>(α) (C=O)), 31.8 (CH<sub>2</sub>-CH<sub>2</sub>-CH<sub>3</sub>), 29.6, 29.5, 29.4, 29.3, 29.2, 29.1, 29.0 (CH<sub>2</sub>), 26.0 (O-CH<sub>2</sub>-CH<sub>2</sub>), 24.9 (CH<sub>2</sub>(β) (C=O)), 22.7 (CH<sub>2</sub>-CH<sub>3</sub>), 14.1 (CH<sub>3</sub>).

**6-Chloro-1-hexyl hexadecanoate [CAS: 486424-47-9]:** <sup>1</sup>H NMR (CDCl<sub>3</sub>) δ: 0.88 (t, *J*=6.6 Hz, 3 H) 1.20-1.52 (m, 28 H) 1.57-1.70 (m, 4 H) 1.77-1.83 (m, 2 H) 2.29 (t, *J*=7.3 Hz, 2 H) 3.54 (t, *J*=6.7 Hz, 2 H) 4.07 (t, *J*=6.6 Hz, 2 H). <sup>13</sup>C-RMN (CDCl<sub>3</sub>), δ: 173.8 (C=O), 64.0 (O-CH<sub>2</sub>), 44.8 (CH<sub>2</sub>-Cl), 34.3 (CH<sub>2</sub>(α) (C=O)), 32.4 (O-CH<sub>2</sub>-CH<sub>2</sub>), 31.9 (CH<sub>2</sub>-CH<sub>2</sub>-CH<sub>3</sub>), 29.6, 29.4, 29.3, 29.2, 29.1, 29.0, 28.4, (CH<sub>2</sub>), 26.4 (O-CH<sub>2</sub>-CH<sub>2</sub>-CH<sub>2</sub>-CH<sub>2</sub>), 25.2 (O-CH<sub>2</sub>-CH<sub>2</sub>-CH<sub>2</sub>), 24.9 (CH<sub>2</sub>(β) (C=O)), 22.6 (CH<sub>2</sub>-CH<sub>3</sub>), 14.0 (CH<sub>3</sub>).

**2-Chloro-1-propyl hexadecanoate (A) [CAS: 23290-41-7] and 1-chloro-2-propyl hexadecanoate (B) [CAS: 486424-48-0]:** *B Regioisomer:*  $^1\text{H}$  NMR ( $\text{CDCl}_3$ )  $\delta$ : 0.88 (t,  $J=6.56$  Hz, 3 H) 1.20-1.35 (m, 24 H) 1.32 (d,  $J=6.4$  Hz, 3 H) 1.60-1.75 (m, 2 H) 2.31 (t,  $J=7.2$  Hz, 2 H) 3.55 (dd,  $J=11.4, 5.5$  Hz, 1 H) 3.59 (dd,  $J=11.4, 5.1$  Hz, 1 H) 5.05-5.16 (m, 1 H).  $^{13}\text{C}$ -RMN ( $\text{CDCl}_3$ ),  $\delta$ : 173.0 (C=O), 69.3 (O- $\text{CH}_2$ ), 46.8 ( $\text{CH}_2\text{-Cl}$ ), 34.4 ( $\text{CH}_2(\omega)$  (C=O)), 31.8 ( $\text{CH}_2\text{-CH}_2\text{-CH}_3$ ), 29.7, 29.6, 29.5, 29.4, 29.3, 29.2, 29.1, 29.0 ( $\text{CH}_2$ ), 24.9 ( $\text{CH}_2(\beta)$  (C=O)), 22.6 ( $\text{CH}_2\text{-CH}_3$ ), 17.5 (O- $\text{CH-CH}_3$ ), 14.1 ( $\text{CH}_3$ ). *A Regioisomer:*  $^1\text{H}$  NMR ( $\text{CDCl}_3$ )  $\delta$ : 1.52 (d,  $J=6.7$  Hz, 3 H) 3.80-3.83 (m, 1 H) 4.15-4.21 (m, 2 H).  $^{13}\text{C}$ -RMN ( $\text{CDCl}_3$ ),  $\delta$ : 72.0 (O- $\text{CH}_2$ ), 53.8 ( $\text{CH}_2\text{-Cl}$ ), 21.6 ( $\text{CH}_2\text{-CH}_3$ ). All other NMR signals are hidden by the signals of B.

**3-Chloro-1-butyl hexadecanoate (A) [CAS: 23139-83-5] and 4-chloro-2-butyl hexadecanoate (B) [CAS: 486424-51-5]:** *B Regioisomer:*  $^1\text{H}$  NMR ( $\text{CDCl}_3$ )  $\delta$ : 0.88 (t,  $J=6.4$  Hz, 3 H) 1.20-1.35 (m, 27 H) 1.1.58-1.66 (m, 2 H) 1.90-2.14 (m, 2 H) 2.29 (t,  $J=7.3$  Hz, 2 H) 3.53 (dt,  $J=6.6, 1.1$  Hz, 2 H) 5.05-5.58 (m, 1 H).  $^{13}\text{C}$ -RMN ( $\text{CDCl}_3$ ),  $\delta$ : 173.3 (C=O), 67.9 (O- $\text{CH}$ ), 40.7 (O- $\text{CH-CH}_2$ ), 38.7 ( $\text{CH}_2\text{-Cl}$ ), 34.5 ( $\text{CH}_2(\omega)$  (C=O)), 31.9 ( $\text{CH}_2\text{-CH}_2\text{-CH}_3$ ), 29.7, 29.6, 29.4, 29.3, 29.2, 29.1 ( $\text{CH}_2$ ), 25.0 ( $\text{CH}_2(\beta)$  (C=O)), 22.7 ( $\text{CH}_2\text{-CH}_3$ ), 19.9 (O- $\text{CH-CH}_3$ ), 14.1 ( $\text{CH}_3$ ). *A Regioisomer:*  $^1\text{H}$  NMR ( $\text{CDCl}_3$ )  $\delta$ : 1.55 (d,  $J=6.6$  Hz, 3H) 4.06-4.41 (m, 3 H).  $^{13}\text{C}$ -RMN ( $\text{CDCl}_3$ ),  $\delta$ : 61.5 (O- $\text{CH}$ ), 54.2 ( $\text{CH-Cl}$ ). All other NMR signals are hidden by the signals of B.

**4-chloro-1-pentyl hexadecanoate (A) [CAS: 486424-52-6] and 5-chloro-2-pentyl hexadecanoate (B) [CAS: 486424-53-7].** *B Regioisomer:*  $^1\text{H}$  NMR ( $\text{CDCl}_3$ )  $\delta$ : 0.88 (t,  $J=6.6$  Hz, 3 H) 1.18-1.37 (m, 24 H) 1.23 (d,  $J=6.3$  Hz, 3 H) 2.30 (t,  $J=7.6$  Hz, 2 H) 3.54 (t,  $J=6.7$  Hz, 2 H) 4.94 (tq,  $J=6.3, 6.3$  Hz, 1 H).  $^{13}\text{C}$ -RMN ( $\text{CDCl}_3$ ),  $\delta$ : 173.7 (C=O), 69.9 (O- $\text{CH}$ ), 44.9 ( $\text{CH}_2\text{-CH}_2\text{Cl}$ ), 34.9 ( $\text{CH}_2(\omega)$  (C=O)), 33.5 (O- $\text{CH-CH}_2$ ), 32.1 ( $\text{CH}_2\text{-CH}_2\text{-CH}_3$ ), 29.9, 29.8, 29.7, 29.6, 29.5, 29.4, 29.3 ( $\text{CH}_2$ ), 28.8 (O- $\text{CH-CH}_2\text{-CH}_2$ ), 26.2, 25.6 ( $\text{CH}_2(\beta)$  (C=O)), 22.9 ( $\text{CH}_2\text{-CH}_3$ ), 20.3 (O- $\text{CH-CH}_3$ ), 14.3 ( $\text{CH}_3$ ). *A Regioisomer:*  $^1\text{H}$  NMR ( $\text{CDCl}_3$ )  $\delta$ : 1.53 (d,  $J=6.6$  Hz, 3 H) 2.27 (t,  $J=7.3$  Hz, 2 H) 4.00-4.15 (m, 3 H) 1.57-1.88 (m, 6 H).  $^{13}\text{C}$ -RMN ( $\text{CDCl}_3$ ),  $\delta$ : 174.1 (C=O), 63.8 (O- $\text{CH}_2$ ), 58.3 ( $\text{CH}_2\text{-CHCl}$ ), 36.9 (O- $\text{CH}_2\text{-CH}_2\text{-CH}_2$ ), 25.2 (O- $\text{CH}_2\text{-CH}_2$ ), 25.3 ( $\text{CH}_2\text{-CHClCH}_3$ ). All other NMR signals are hidden by the signals of B.
